# Supplementary material
Source: MDPI journal article supplement (https://www.mdpi.com/2073-4344/12/6/675)
Supplement: s1 [file s1 › catalysts-1731837-SM.pdf]

# Quality or Quantity? How Structural Parameters Affect Catalytic Activity of Iron Oxides for CO Oxidation

Steffen Schlicher <sup>1</sup>, Nils Prinz <sup>2</sup>, Julius Bürger <sup>3</sup>, Andreas Omlor <sup>4</sup>, Christian Singer <sup>5</sup>, Mirijam Zobel <sup>2</sup>, Roland Schoch <sup>1</sup>, Jörg K. N. Lindner <sup>3</sup>, Volker Schünemann <sup>4</sup>, Sven Kureti <sup>5</sup> and Matthias Bauer <sup>1,\*</sup>

<sup>1</sup> Department of Chemistry and Center for Sustainable Systems Design (CSSD), Paderborn University, Warburger Straße 100, 33098 Paderborn (Germany); Matthias.Bauer@upb.de

<sup>2</sup> Institute of Crystallography, RWTH Aachen University, Jägerstr. 17-19, 52066 Aachen (Germany); Zobel@ifk.rwth-aachen.de

<sup>3</sup> Department of Physics, Paderborn University, Warburger Straße 100, 33098 Paderborn (Germany); Lindner@physik.upb.de

<sup>4</sup> Department of Physics, Technical University of Kaiserslautern, Erwin-Schrödinger-Straße 46, 67663 Kaiserslautern (Germany); Schuene@physik.uni-kl.de

<sup>5</sup> Institute of Energy Process Engineering and Chemical Engineering, Chair of Reaction Engineering, Technical University of Freiberg, Fuchsmühlenweg 9, 09599 Freiberg (Germany); Sven.Kureti@iec.tu-freiberg.de

\* Correspondence: Matthias.Bauer@upb.de

## Table of Contents

|                                                                              |    |
|------------------------------------------------------------------------------|----|
| 1. Phase Purity of the $\gamma$ -Al <sub>2</sub> O <sub>3</sub> support..... | 2  |
| 2. Powder X-Ray Diffraction.....                                             | 3  |
| 3. High Resolution Powder X-Ray Diffraction.....                             | 4  |
| 4. Pair Distribution Function Analysis.....                                  | 5  |
| 5. Low Temperature Mössbauer Spectroscopy (77 K).....                        | 8  |
| 6. UV/Vis-Spectroscopy.....                                                  | 10 |
| 7. X-Ray Absorption Spectroscopy.....                                        | 16 |
| 8. Catalytic Activity.....                                                   | 31 |
| References.....                                                              | 34 |

### 1. Phase Purity of the $\gamma$ -Al<sub>2</sub>O<sub>3</sub> Support

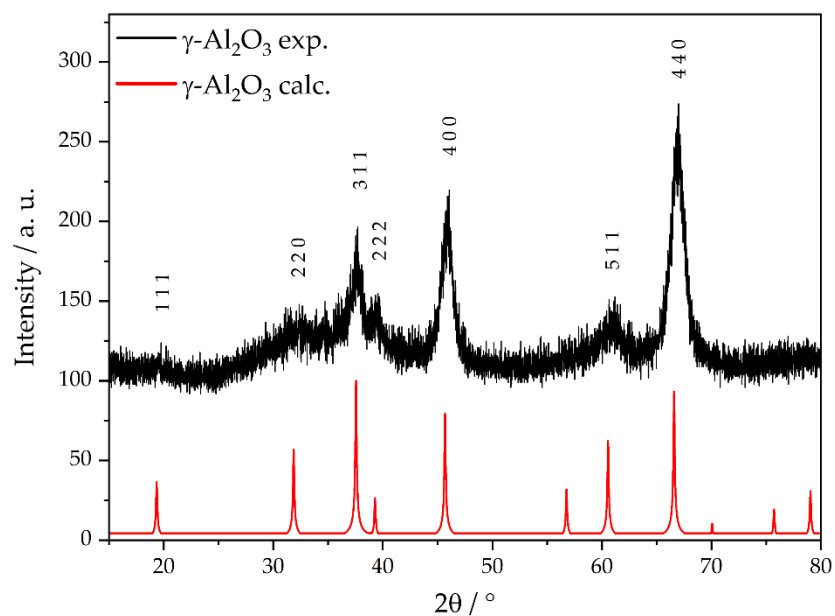

**Figure S1.** : Experimental powder X-ray diffractogram of the as prepared  $\gamma$ -Al<sub>2</sub>O<sub>3</sub> support compared to a calculated powder pattern, obtained via the program Mercury[1] from a crystal structure[2,3].

## 2. Powder X-Ray Diffraction

Powder X-ray diffractometry was carried out at a Bruker AXS D8 Advance with an incident Cu K $\alpha$  radiation ( $\lambda = 1.54 \text{ \AA}$ ), a step size of  $2\theta = 0.02^\circ$ , time per step of 3 s and a wide-angle range of  $10^\circ$  to  $80^\circ$ .

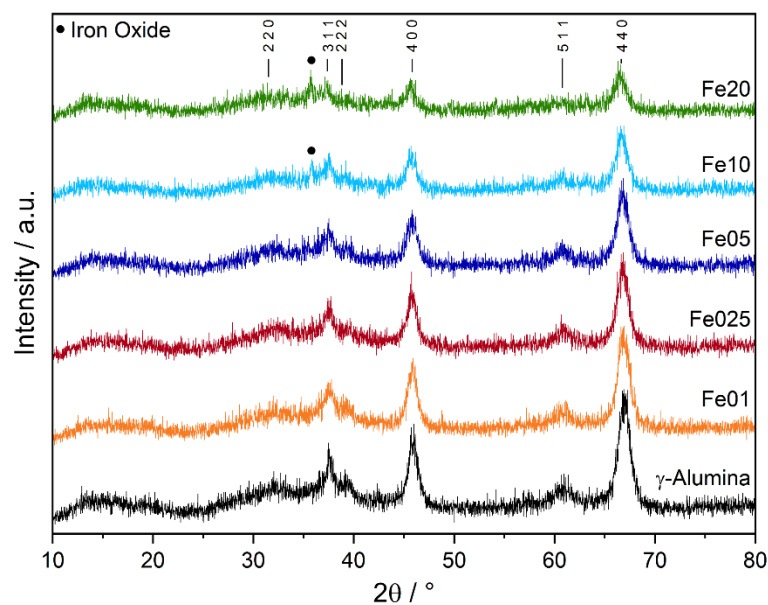

**Figure S2.** powder X-ray diffractograms of Fe01 to Fe20, compared to the  $\gamma$ -Al $_2$ O $_3$  support, obtained at the in-house setup.

### 3. High Resolution Powder X-Ray Diffraction

Calculation of Plane Distance  $d$  and Lattice Parameter  $a$ :

According to Bragg's law the plane distances can be calculated by

$$d = \frac{\lambda}{2 \sin\left(\frac{\theta\pi}{180}\right)} \quad (\text{S1})$$

These parameters can further be transformed into the lattice parameter  $a$  for each plane using its Miller or Laue indices by the following formula:

$$d = \frac{a}{\sqrt{h^2 + k^2 + l^2}} \quad (\text{S2})$$

#### 4. Pair Distribution Function Analysis

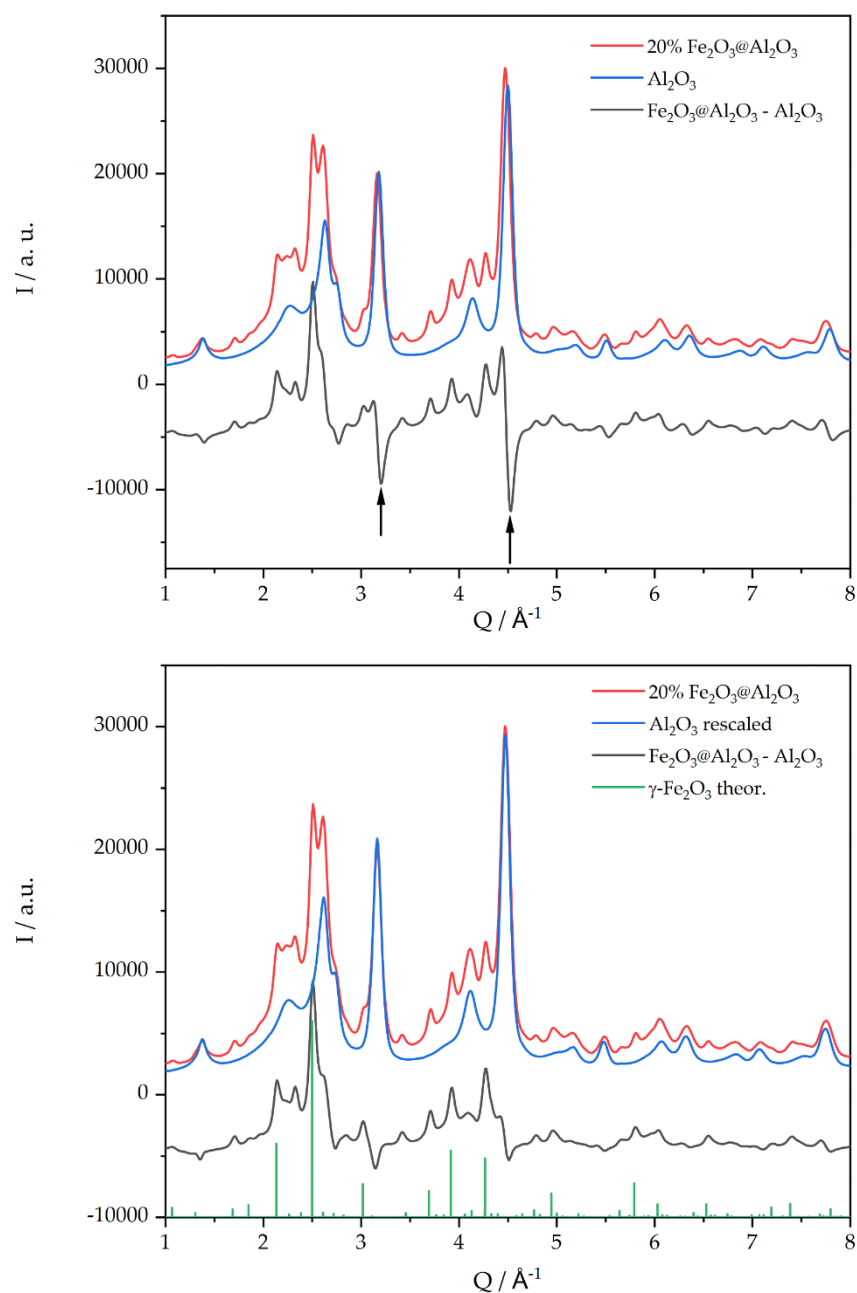

**Figure S3:** XRD of 20 % Fe loading (red) together with unloaded  $\text{Al}_2\text{O}_3$  support (blue) and difference curve (grey, in offset). The top panel shows the direct subtraction of experimental data resulting in strong dips at  $Q$  values where strong  $\text{Al}_2\text{O}_3$  reflexes of unloaded support appear, because the modified lattice parameters of the  $\text{Al}_2\text{O}_3$  are not taken into account. Bottom panel contains the  $\text{Al}_2\text{O}_3$  pattern compressed by the compressing factor  $s$  for a better match of the  $\text{Al}_2\text{O}_3$  reflexes, thus creating less strong dips in the difference curve, which is indexed with  $\gamma\text{-Fe}_2\text{O}_3$ .

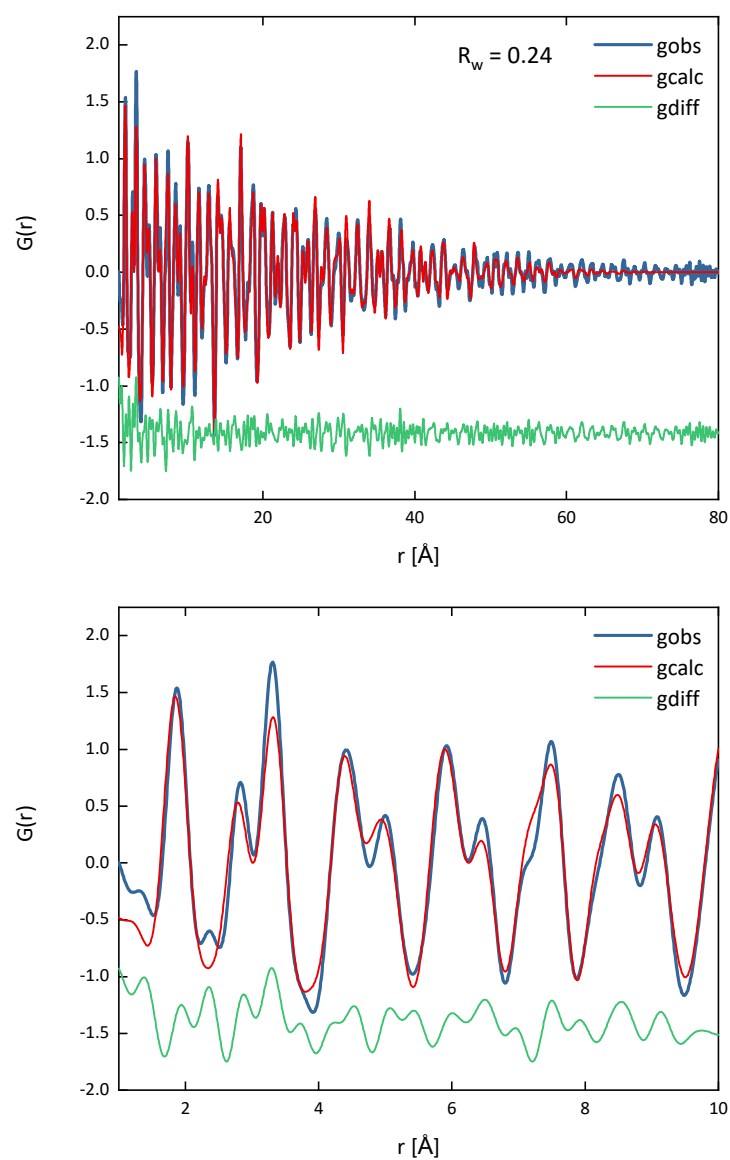

**Figure S4:** PDF refinement of the  $\gamma$ -Al<sub>2</sub>O<sub>3</sub> support over the range 1 - 80 Å (a) and magnification of the 1-10 Å range (b).

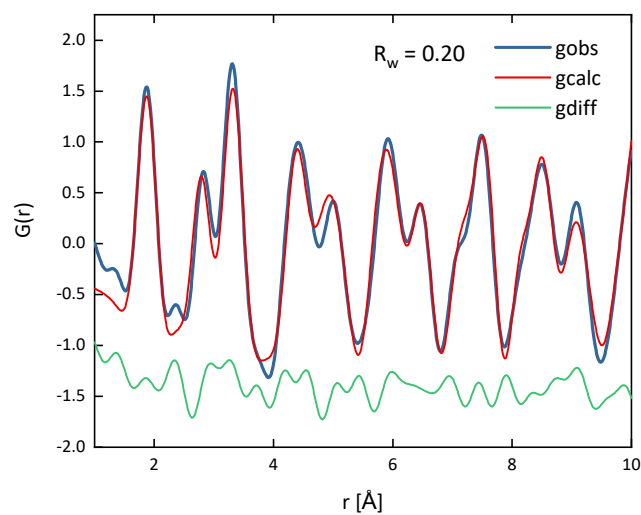

**Figure S5:** refinement of only the short-range order of the  $\gamma$ -Al<sub>2</sub>O<sub>3</sub> support between 1 - 10 Å with different occupation of octahedral and tetrahedral positions.

The nominal occupancies of Al<sup>3+</sup> ions on tetrahedral (8a, 48f Wyckoff positions) and octahedral positions (16c, 16d Wyckoff positions) were refined to 0.4 and 0.6 respectively. A high fraction of 22% of all Al<sup>3+</sup> ions occupy non-spinel positions (16c, 48f Wyckoff positions), and these non-spinel positions are needed for a good agreement in the long range.

**Table S1.** : Refinement values.

| Parameter                                                                  | Range 1–80 Å       | Range 1–10 Å        |
|----------------------------------------------------------------------------|--------------------|---------------------|
| B <sub>iso</sub> 16c (Al <sup>3+</sup> )                                   | 1.6 Å <sup>2</sup> | 0.01 Å <sup>2</sup> |
| B <sub>iso</sub> 16d (Al <sup>3+</sup> )                                   | 0.9 Å <sup>2</sup> | 0.9 Å <sup>2</sup>  |
| B <sub>iso</sub> 48f(Al <sup>3+</sup> )                                    | 0.4 Å <sup>2</sup> | 0.2 Å <sup>2</sup>  |
| B <sub>iso</sub> 8a (Al <sup>3+</sup> )                                    | 1.7 Å <sup>2</sup> | 1.0 Å <sup>2</sup>  |
| B <sub>iso</sub> (O <sup>2-</sup> )                                        | 2.0 Å <sup>2</sup> | 2.2 Å <sup>2</sup>  |
| Lattice parameter a                                                        | 7.919 Å            | 7.927 Å             |
| δ2                                                                         | 2.5                | 2.3                 |
| Occupancy 16c site                                                         | 0.20               | 0.08                |
| Occupancy 16d site                                                         | 0.59               | 0.74                |
| Occupancy 48f site                                                         | 0.03               | 0.04                |
| Occupancy 8a site                                                          | 0.89               | 0.77                |
| Calculated nominal occupied octahedral(16c,16d) Al <sup>3+</sup> positions | 0.60               | 0.62                |
| Nominal fraction of non-spinel positions (16c, 48f)                        | 0.22               | 0.15                |
| Crystal domain size                                                        | 7.1 nm             | 11.9 nm             |

### 5. Low Temperature Mössbauer Spectroscopy (77 K)

Fe025:

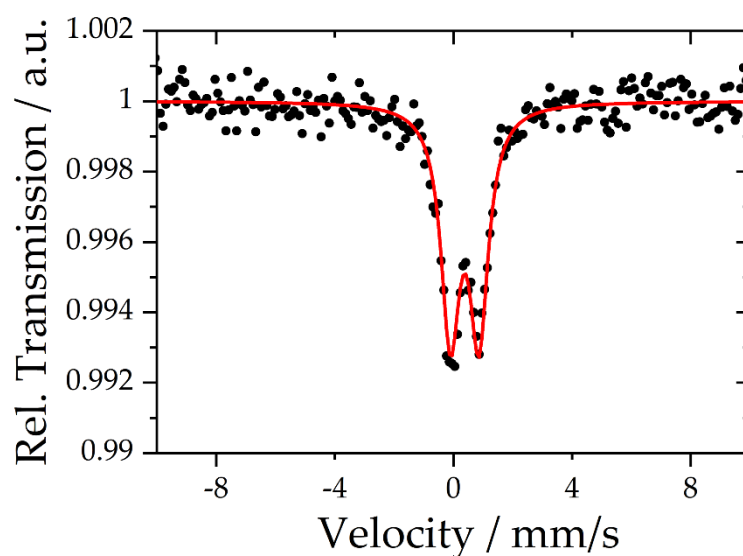

**Figure S6:** Mössbauer spectrum of Fe025 (black dots) obtained at 77 K and corresponding fit of the doublet (red).

**Table S2:** Parameters obtained by Mössbauer spectroscopy of Fe025 at 77 K.

| $\delta$ [mm/s] | $\Delta E_Q$ [mm/s] | $\Gamma$ [mm/s] |
|-----------------|---------------------|-----------------|
| 0.38            | 0.97                | 0.76            |

Fe05:

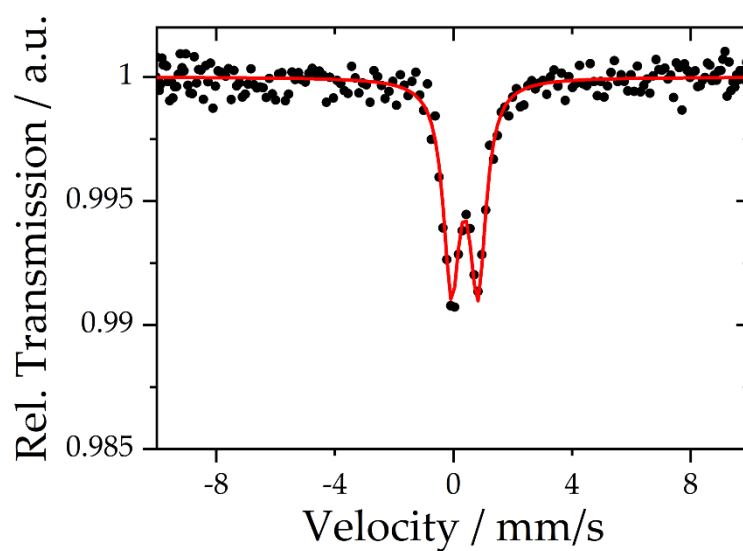

**Figure S7:** Mössbauer spectrum of Fe05 (black dots) obtained at 77 K and corresponding fit of the doublet (red).

**Table S3:** Parameters obtained by Mössbauer spectroscopy of Fe05 at 77 K.

| $\delta$ [mm/s] | $\Delta E_Q$ [mm/s] | $\Gamma$ [mm/s] |
|-----------------|---------------------|-----------------|
| 0.38            | 0.89                | 0.66            |

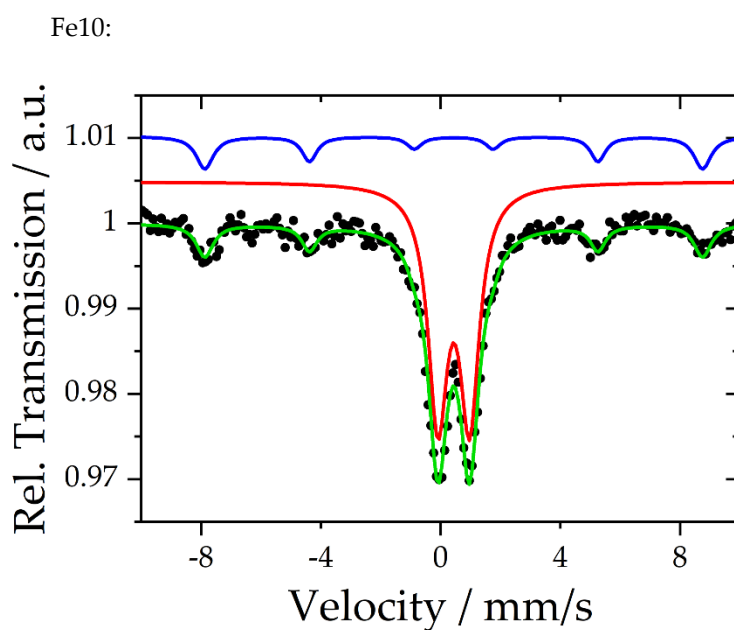

**Figure S8:** Mössbauer spectrum of Fe10 (black dots) obtained at 77 K, fit of the doublet (red), sextet (blue) and the cumulative fit (green).

**Table S4:** Parameters obtained by Mössbauer spectroscopy of Fe10 at 77 K. Ratio doublet to sextet 80:20 by area.

|           | $\delta$ [mm/s] | $\Delta E_Q$ [mm/s] | $\Gamma$ [mm/s] |
|-----------|-----------------|---------------------|-----------------|
| <b>d</b>  | 0.44            | 1.06                | 0.77            |
| <b>sx</b> | 0.44            | $B_{hf} = 51.5$ T   |                 |

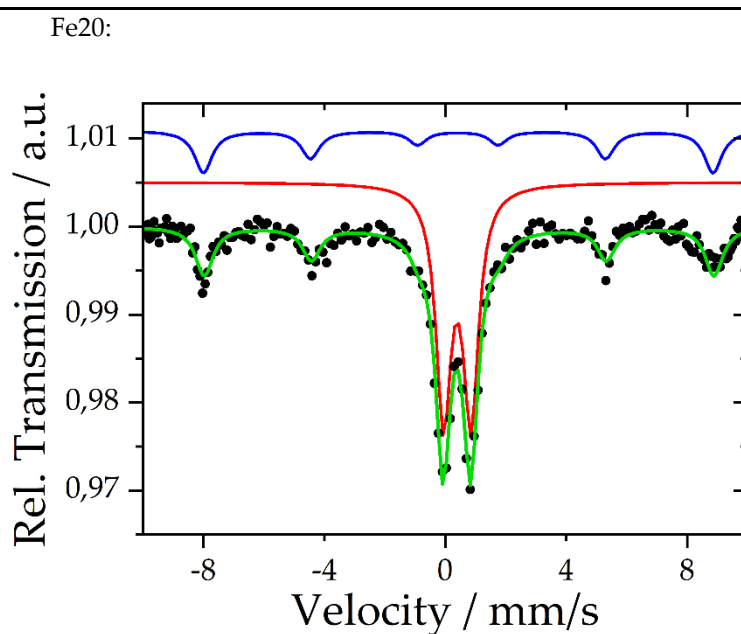

**Figure S9:** Mössbauer spectrum of Fe20 (black dots) obtained at 77 K, fit of the doublet (red), sextet (blue) and the cumulative fit (green).

**Table S5:** Parameters obtained by Mössbauer spectroscopy of Fe20 at 77 K. Ratio doublet to sextet 67:33 by area.

|          | $\delta$ [mm/s] | $\Delta E_Q$ [mm/s] | $\Gamma$ [mm/s] |
|----------|-----------------|---------------------|-----------------|
| <b>d</b> | 0.39            | 0.91                | 0.51            |

|           |      |                                |
|-----------|------|--------------------------------|
| <b>sx</b> | 0.46 | <b>B<sub>hf</sub></b> = 52.3 T |
|-----------|------|--------------------------------|

## 6. UV/Vis Spectroscopy

Peak deconvolution of the diffuse reflectance UV/Vis spectra was carried out using the NLFit function of Origin 2020b with 5 Gaussian type functions for catalysts Fe01, Fe025 and Fe05 and with 6 Gaussian type functions for Fe10 and Fe20. The range of the fitted area was kept between the first zero value for absorption in both lower and upper energy direction. The starting points for the peakfit were set manually at 270, 300, 350, 450, 530 and 650 nm matching the visible shoulders/peaks in approximation. The y0 lower limits were set manually for each fit corresponding to the lower limit of the experimental spectra and for peaks 1 and 3 lower limits of 260 nm, respectively 340 nm, were set.

Fe01:

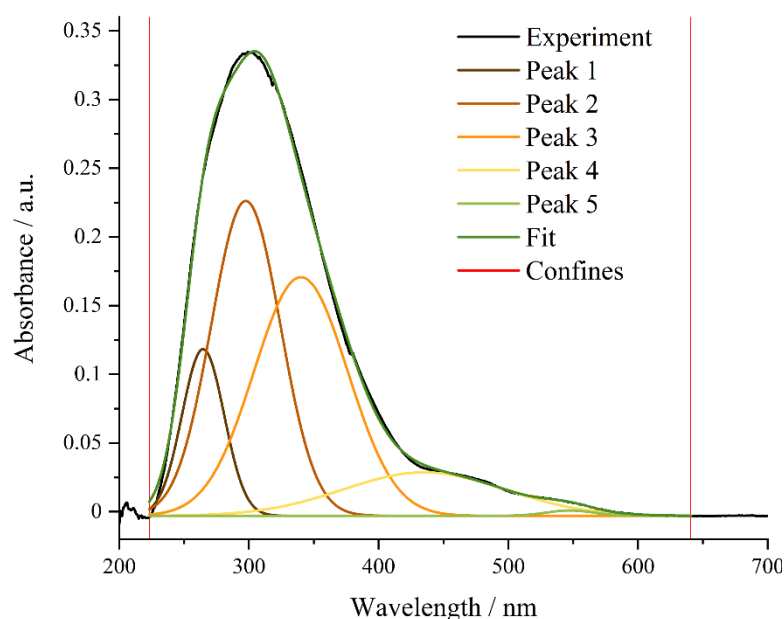

**Figure S10:** DRUV spectrum and deconvolution of Fe01.

**Table S6:** Parameters of the peak deconvolution of Fe01.

| <b>Model</b>   | <b>Gaussian</b>                                       |                         |                         |                         |                         |
|----------------|-------------------------------------------------------|-------------------------|-------------------------|-------------------------|-------------------------|
| Function       | $y=y_0 + (A/(w*\sqrt{\pi/2}))*\exp(-2*((x-x_c)/w)^2)$ |                         |                         |                         |                         |
|                | Peak 1                                                | Peak 2                  | Peak 3                  | Peak 4 <sup>1</sup>     | Peak 5                  |
| Y0             | $-0.003 \pm 8.19729E-4$                               | $-0.003 \pm 8.19729E-4$ | $-0.003 \pm 8.19729E-4$ | $-0.003 \pm 8.19729E-4$ | $-0.003 \pm 8.19729E-4$ |
| x <sub>c</sub> | $264.59438 \pm 0.44817$                               | $297.54298 \pm 1.91962$ | $340 \pm 13.18916$      | $435 \pm 23.47277$      | $547.55219 \pm 4.11191$ |
| Area           | $4.94029 \pm 1.17361$                                 | $15.31479 \pm 7.63358$  | $15.70824 \pm 8.3174$   | $4.95468 \pm 2.16194$   | $0.17939 \pm 0.15203$   |
| $\chi^2_{red}$ | 8.64457E-6                                            |                         |                         |                         |                         |
| $r^2_{corr}$   | 0.99934                                               |                         |                         |                         |                         |

1) For catalyst Fe01 a lower limit of 435 nm was set for peak 4.

**Table S7:** Assignment of the peaks and their normalized areas to tetrahedral, octahedral and oligomerized iron oxide. Percentual amounts of the respective iron species of the overall amount of catalyst, calculated from the percentual areas multiplied by the iron loading.

| $\lambda_c$ [nm] | Area [a.u.] | Area <sub>norm</sub> [%] | Area <sub>norm</sub> [%]                 | Amount <sub>norm</sub> [wt%] |
|------------------|-------------|--------------------------|------------------------------------------|------------------------------|
| 265              | 4.94        | 12.0223899               | Fe <sub>tet</sub>                        | 12.0                         |
| 298              | 15.31       | 37.2596739               | Fe <sub>oct</sub>                        | 37.3                         |
| 340              | 15.71       | 38.2331468               | Fe <sub>x</sub> O <sub>y</sub> olig.     | 50.3                         |
| 435              | 4.95        | 12.0467267               | Fe <sub>x</sub> O <sub>y</sub> particles | 0.44                         |
| 548              | 0.18        | 0.43806279               |                                          |                              |

Fe025:

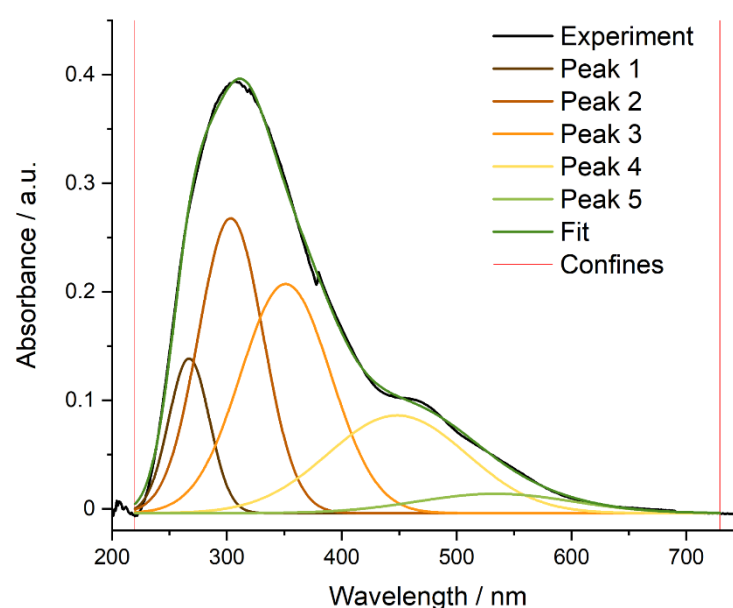

**Figure S11:** DRUV spectrum and deconvolution of Fe025.

**Table S8:** Parameters of the peak deconvolution of Fe025.

| Model          | Gaussian                                              |                         |                          |                          |                           |
|----------------|-------------------------------------------------------|-------------------------|--------------------------|--------------------------|---------------------------|
| Function       | $y=y_0 + (A/(w*\sqrt{\pi/2}))*\exp(-2*((x-x_c)/w)^2)$ |                         |                          |                          |                           |
|                | Peak 1                                                | Peak 2                  | Peak 3                   | Peak 4                   | Peak 5                    |
| Y0             | $-0.004 \pm 0.00123$                                  | $-0.004 \pm 0.00123$    | $-0.004 \pm 0.00123$     | $-0.004 \pm 0.00123$     | $-0.004 \pm 0.00123$      |
| $x_c$          | $267.06786 \pm 0.83954$                               | $303.37247 \pm 1.98923$ | $351.23636 \pm 14.88785$ | $448.35421 \pm 47.75321$ | $533.71673 \pm 475.13726$ |
| Area           | $6.33151 \pm 1.96755$                                 | $19.19314 \pm 11.61768$ | $20.79024 \pm 15.63306$  | $13.63946 \pm 35.64092$  | $3.02486 \pm 30.08959$    |
| $\chi^2_{red}$ | 1.27031E-5                                            |                         |                          |                          |                           |
| $r^2_{corr}$   | 0.99923                                               |                         |                          |                          |                           |

**Table S9:** Assignment of the peaks and their normalized areas to tetrahedral, octahedral and oligomerized iron oxide. Percentual amounts of the respective iron species of the overall amount of catalyst, calculated from the percentual areas multiplied by the iron loading.

| Xc [nm] | Area [a.u.] | Area <sub>norm</sub> [%] | Area <sub>norm</sub> [%]                 | Amount <sub>norm</sub> [wt%] |
|---------|-------------|--------------------------|------------------------------------------|------------------------------|
| 267     | 6.33        | 10,7891597               | Fe <sub>tet</sub>                        | 10.8                         |
| 303     | 20.79       | 35,4354866               | Fe <sub>oct</sub>                        | 35.4                         |
| 351     | 14.89       | 25,3792398               | Fe <sub>x</sub> O <sub>y</sub> olig.     | 48.6                         |
| 448     | 13.64       | 23,2486791               |                                          |                              |
| 534     | 3.02        | 5,1474348                | Fe <sub>x</sub> O <sub>y</sub> particles | 5.15                         |
|         |             |                          |                                          | 0.12869                      |

Fe05:

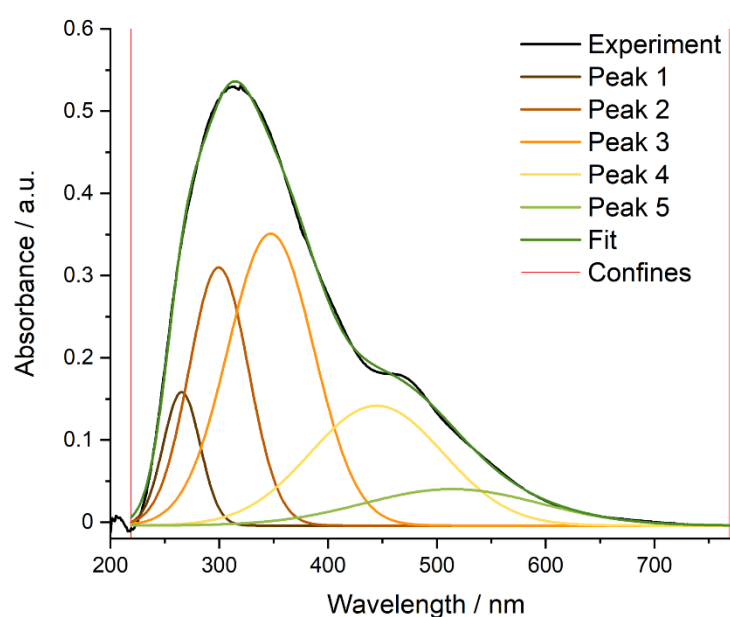

**Figure S12:** DRUV spectrum and deconvolution of Fe05.

**Table S10:** Parameters of the peak deconvolution of Fe05.

| Model          | Gaussian                                              |                  |                  |                  |                  |
|----------------|-------------------------------------------------------|------------------|------------------|------------------|------------------|
| Function       | $y=y_0 + (A/(w*\sqrt{\pi/2}))*\exp(-2*((x-x_c)/w)^2)$ |                  |                  |                  |                  |
|                | Peak 1                                                | Peak 2           | Peak 3           | Peak 4           | Peak 5           |
| Y0             | -0.004 ± 0.00147                                      | -0.004 ± 0.00147 | -0.004 ± 0.00147 | -0.004 ± 0.00147 | -0.004 ± 0.00147 |
| x <sub>c</sub> | 265.51099 ±                                           | 299.59546 ±      | 347.44616 ±      | 444.78092 ±      | 513.93943 ±      |
|                | 0.77465                                               | 1.55765          | 8.9343           | 6.72789          | 334.27517        |
| Area           | 6.9185 ± 2.22583                                      | 21.46817 ±       | 35.09611 ±       | 22.27018 ±       | 9.01596 ±        |
|                |                                                       | 11.9875          | 14.23345         | 50.55156         | 47.92497         |
| $\chi^2_{red}$ |                                                       |                  | 1.85126E-5       |                  |                  |
| $r^2_{corr}$   |                                                       |                  | 0.9994           |                  |                  |

**Table S11:** Assignment of the peaks and their normalized areas to tetrahedral, octahedral and oligomerized iron oxide. Percentual amounts of the respective iron species of the overall amount of catalyst, calculated from the percentual areas multiplied by the iron loading.

| Xc [nm] | Area [a.u.] | Area <sub>norm</sub> [%] | Area <sub>norm</sub> [%]                 | Amount <sub>norm</sub> [wt%] |
|---------|-------------|--------------------------|------------------------------------------|------------------------------|
| 266     | 6.92        | 7.30111838               | Fe <sub>tet</sub>                        | 7.30                         |
| 300     | 21.47       | 22.6524583               | Fe <sub>oct</sub>                        | 22.7                         |
| 347     | 35.1        | 37.0331294               | Fe <sub>x</sub> O <sub>y</sub> olig.     | 60.5                         |
| 445     | 22.27       | 23.4965183               |                                          |                              |
| 514     | 9.02        | 9.51677569               | Fe <sub>x</sub> O <sub>y</sub> particles | 9.52                         |

Fe10:

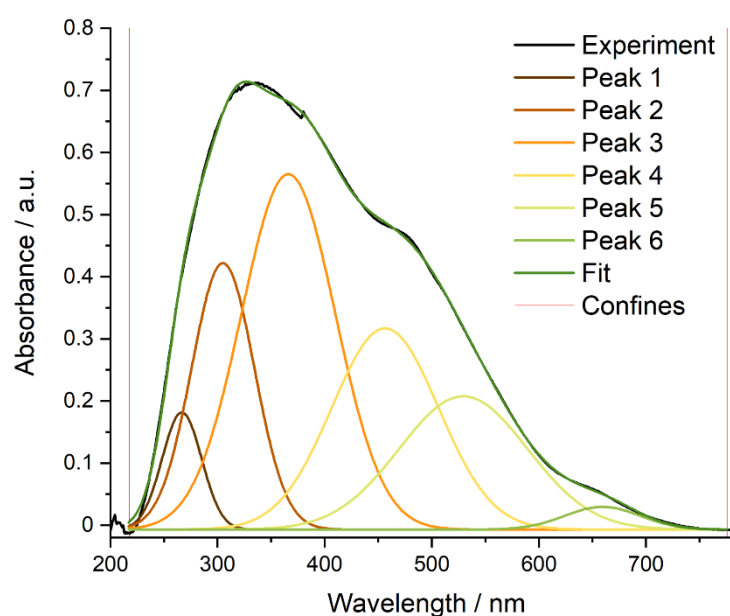

**Figure S13:** DRUV spectrum and deconvolution of Fe10.

**Table S12:** Parameters of the peak deconvolution of Fe10.

| Model          | Gaussian                                              |             |             |             |             |             |
|----------------|-------------------------------------------------------|-------------|-------------|-------------|-------------|-------------|
| Function       | $y=y_0 + (A/(w*\sqrt{\pi/2}))*\exp(-2*((x-x_c)/w)^2)$ |             |             |             |             |             |
|                | Peak 1                                                | Peak 2      | Peak 3      | Peak 4      | Peak 5      | Peak 6      |
| Y0             | -0.007 ±                                              | -0.007 ±    | -0.007 ±    | -0.007 ±    | -0.007 ±    | -0.007 ±    |
|                | 9.40638E-4                                            | 9.40638E-4  | 9.40638E-4  | 9.40638E-4  | 9.40638E-4  | 9.40638E-4  |
| x <sub>c</sub> | 266.70925 ±                                           | 305.05144 ± | 366.12353 ± | 456.49094 ± | 529.53263 ± | 659.49034 ± |
|                | 1.03707                                               | 1.38058     | 8.60039     | 37.17483    | 226.9542    | 10.0261     |
| Area           | 8.71372 ±                                             | 31.49412 ±  | 62.94732 ±  | 40.40586 ±  | 32.19596 ±  | 3.22821 ±   |
|                | 2.6543                                                | 18.39082    | 51.60488    | 182.6243    | 151.95975   | 2.9828      |
| $\chi^2_{red}$ | 1.97494E-5                                            |             |             |             |             |             |
| $r^2_{corr}$   | 0.99971                                               |             |             |             |             |             |

**Table S13:** Assignment of the peaks and their normalized areas to tetrahedral, octahedral and oligomerized iron oxide. Percentual amounts of the respective iron species of the overall amount of catalyst, calculated from the percentual areas multiplied by the iron loading.

| Xc [nm] | Area [a.u.] | Area <sub>norm</sub> [%] | Area <sub>norm</sub> [%]                 | Amount <sub>norm</sub> [wt%] |
|---------|-------------|--------------------------|------------------------------------------|------------------------------|
| 267     | 8.71        | 4.86619364               | Fe <sub>tet</sub>                        | 4.87                         |
| 305     | 31.49       | 17.5931616               | Fe <sub>oct</sub>                        | 17.6                         |
| 366     | 62.95       | 35.1695625               | Fe <sub>x</sub> O <sub>y</sub> olig.     | 57.7                         |
| 456     | 40.41       | 22.5766803               |                                          |                              |
| 530     | 32.2        | 17.9898318               | Fe <sub>x</sub> O <sub>y</sub> particles | 19.8                         |
| 659     | 3.23        | 1.80457009               |                                          |                              |

Fe20:

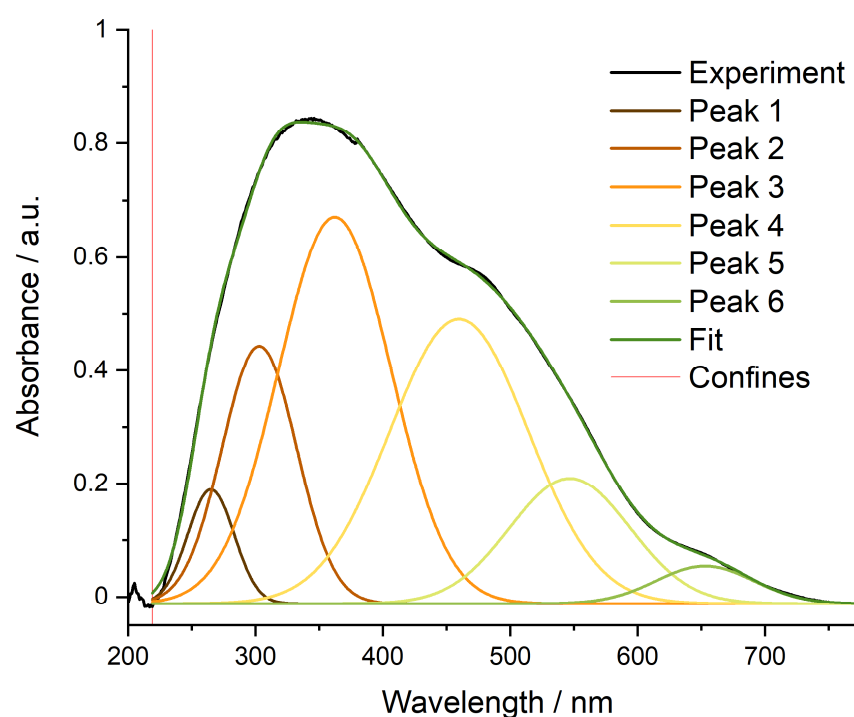

**Figure S14:** DRUV spectrum and deconvolution of Fe20.

**Table S14:** Parameters of the peak deconvolution of Fe2O<sub>3</sub>.

| Model          | Gaussian                                              |             |             |             |            |             |
|----------------|-------------------------------------------------------|-------------|-------------|-------------|------------|-------------|
| Function       | $y=y_0 + (A/(w*\sqrt{\pi/2}))*\exp(-2*((x-x_c)/w)^2)$ |             |             |             |            |             |
|                | Peak 1                                                | Peak 2      | Peak 3      | Peak 4      | Peak 5     | Peak 6      |
| Y0             | -0.012 ±                                              | -0.012 ±    | -0.012 ±    | -0.012 ±    | -0.012 ±   | -0.012 ±    |
|                | 0.00103                                               | 0.00103     | 0.00103     | 0.00103     | 0.00103    | 0.00103     |
| x <sub>c</sub> | 265.08132 ±                                           | 303.06141 ± | 362.35649 ± | 459.83286 ± | 546.8148 ± | 652.81549 ± |
|                | 0.90556                                               | 1.18127     | 6.28092     | 15.1712     | 39.84401   | 5.69897     |
| Area           | 9.21287 ±                                             | 33.33717 ±  | 75.51647 ±  | 68.4914 ±   | 26.18515 ± | 6.40267 ±   |
|                | 2.50049                                               | 15.77893    | 43.38576    | 72.79266    | 44.30672   | 1.35892     |
| $\chi^2_{red}$ | 2.15064E-5                                            |             |             |             |            |             |
| $r^2_{corr}$   | 0.99976                                               |             |             |             |            |             |

**Table S15:** Assignment of the peaks and their normalized areas to tetrahedral, octahedral and oligomerized iron oxide. Percentual amounts of the respective iron species of the overall amount of catalyst, calculated from the percentual areas multiplied by the iron loading.

| X <sub>c</sub> [nm] | Area [a.u.] | Area <sub>norm</sub> [%] | Area <sub>norm</sub> [%]                 | Amount <sub>norm</sub> [wt%] |
|---------------------|-------------|--------------------------|------------------------------------------|------------------------------|
| 265                 | 9.21        | 4.20260096               | Fe <sub>tet</sub>                        | 4.20                         |
| 303                 | 33.3        | 15.2133242               | Fe <sub>oct</sub>                        | 15.2                         |
| 362                 | 75.5        | 34.4604152               | Fe <sub>x</sub> O <sub>y</sub> olig.     | 65.7                         |
| 460                 | 68.5        | 31.2525667               |                                          |                              |
| 547                 | 26.2        | 11.9507187               | Fe <sub>x</sub> O <sub>y</sub> particles | 14.9                         |
| 653                 | 6.40        | 2.92037417               |                                          |                              |

## 7. X-Ray Absorption Spectroscopy

### Prepeak Analysis: Fe01 - Fe20

For prepeak analysis the main edge was subtracted as a Boltzmann-type function. To obtain the precise prepeak position an inverse polynomial function was applied for catalysts Fe01, Fe025, Fe05, Fe10 and Fe20 while for the references  $\alpha$ -Fe<sub>2</sub>O<sub>3</sub> and  $\gamma$ -Fe<sub>2</sub>O<sub>3</sub> two Lorentzian functions were applied.

Fe01:

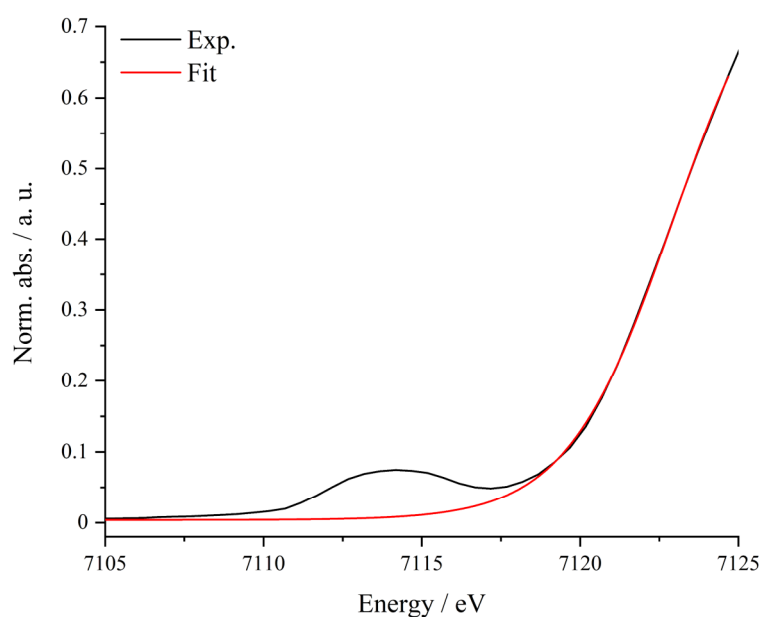

**Figure S15:** Prepeak area of Fe01 and the background to remove the main edge, obtained by a Boltzmann function.

**Table S16:** Fit parameters of the background fit for Fe01.

| Model          | Boltzmann                                |
|----------------|------------------------------------------|
| Equation       | $y = A2 + (A1-A2)/(1 + \exp((x-x0)/dx))$ |
| Plot           | Fe01                                     |
| A1             | $0.00386 \pm 5.57691E-4$                 |
| A2             | $0.84933 \pm 0.01596$                    |
| x0             | $7122.92897 \pm 0.07218$                 |
| dx             | $1.671 \pm 0.02862$                      |
| $\chi^2_{red}$ | 1.2797E-5                                |
| $r^2_{COD}$    | 0.99952                                  |
| $r^2_{corr}$   | 0.99949                                  |

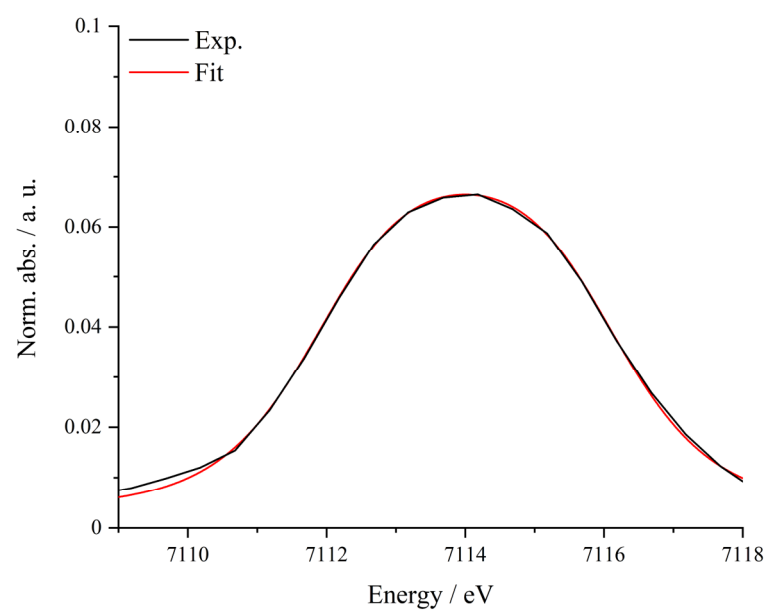

**Figure S16:** Prepeak area of Fe01 with inverse polynomial fit after removal of the main edge.

**Table S17:** Fit parameters of the prepeak fit for Fe01.

| Model         | InvsPoly                                                                |
|---------------|-------------------------------------------------------------------------|
| Equation      | $y=y_0+A/(1+A1*(2*(x-xc)/w)^2 + A2*(2*(x-xc)/w)^4 + A3*(2*(x-xc)/w)^6)$ |
| Plot          | Fe01                                                                    |
| y0            | $0.00328 \pm 0.00117$                                                   |
| xc            | $7113.997 \pm 0.02694$                                                  |
| w             | $4.91615 \pm 3842539.08757$                                             |
| A             | $0.06328 \pm 0.00147$                                                   |
| A1            | $0.50915 \pm 795920.44293$                                              |
| A2            | $0.56888 \pm 1778571.15333$                                             |
| A3            | $0.19565 \pm 917539.61378$                                              |
| $\chi^2_{rd}$ | 2.96405E-6                                                              |
| $r^2_{COD}$   | 0.99601                                                                 |
| $r^2_{corr}$  | 0.99469                                                                 |

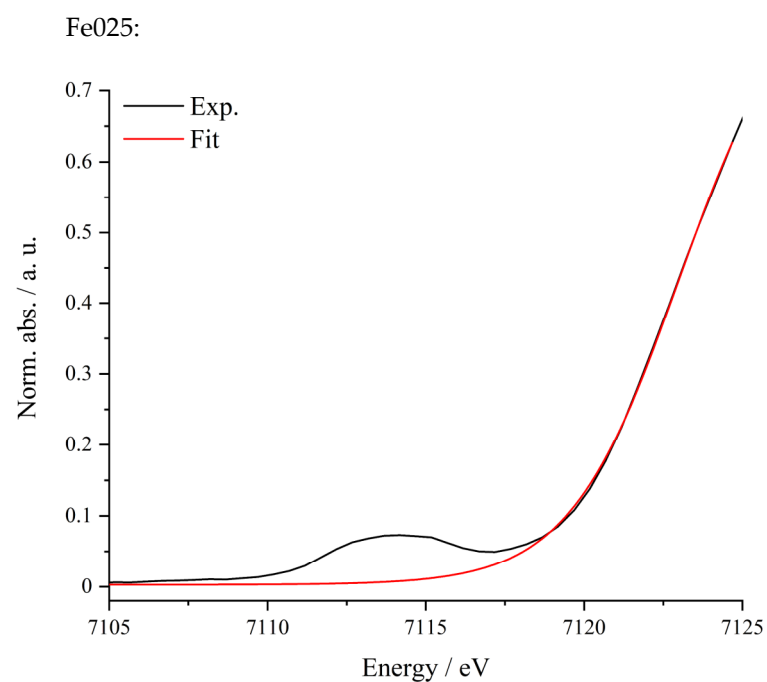

**Figure S17:** Prepeak area of Fe025 and the background to remove the main edge, obtained by a Boltzmann function.

**Table S18:** Fit parameters of the background fit for Fe025.

| Model         | Boltzmann                                |
|---------------|------------------------------------------|
| Equation      | $y = A2 + (A1-A2)/(1 + \exp((x-x0)/dx))$ |
| Plot          | Fe025                                    |
| A1            | $0.00273 \pm 7.69022\text{E-}4$          |
| A2            | $0.86027 \pm 0.02297$                    |
| x0            | $7122.97922 \pm 0.10451$                 |
| dx            | $1.72551 \pm 0.03988$                    |
| $\chi^2_{re}$ | $2.43738\text{E-}5$                      |
| $r^2_{COD}$   | 0.99907                                  |
| $r^2_{corr}$  | 0.99902                                  |

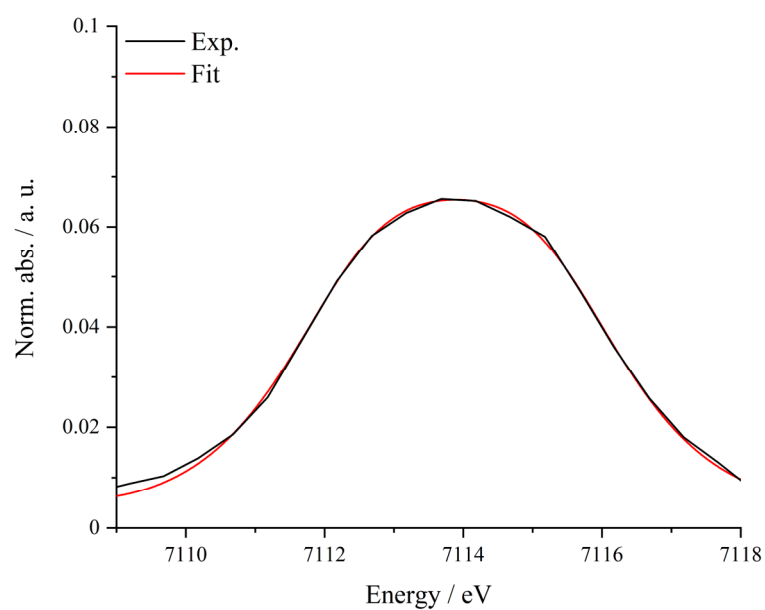

**Figure S18:** Prepeak area of Fe025 with inverse polynomial fit after removal of the main edge.

**Table S19:** Fit parameters of the prepeak fit for Fe025.

| Model         | InvsPoly                                                                |
|---------------|-------------------------------------------------------------------------|
| Equation      | $y=y_0+A/(1+A1*(2*(x-xc)/w)^2 + A2*(2*(x-xc)/w)^4 + A3*(2*(x-xc)/w)^6)$ |
| Plot          | Fe025                                                                   |
| y0            | $-0.00433 \pm 0.00603$                                                  |
| xc            | $7113.8922 \pm 0.02596$                                                 |
| w             | $4.75552 \pm 2515279.36997$                                             |
| A             | $0.06976 \pm 0.00643$                                                   |
| A1            | $0.30799 \pm 325803.2086$                                               |
| A2            | $0.59565 \pm 1260203.86425$                                             |
| A3            | $-0.0843 \pm 267540.07923$                                              |
| $\chi^2_{ed}$ | 2.60441E-6                                                              |
| $r^2_{COD}$   | 0.99645                                                                 |
| $r^2_{corr}$  | 0.99493                                                                 |

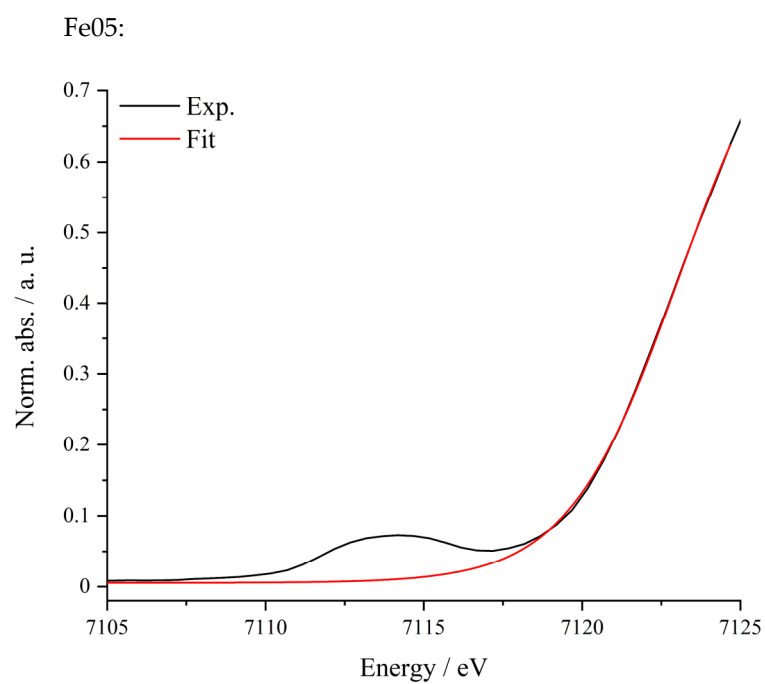

**Figure S19:** Prepeak area of Fe05 and the background to remove the main edge, obtained by a Boltzmann function.

**Table S20:** Fit parameters of the background fit for Fe05.

| Model         | Boltzmann                                |
|---------------|------------------------------------------|
| Equation      | $y = A2 + (A1-A2)/(1 + \exp((x-x0)/dx))$ |
| Plot          | Fe05                                     |
| A1            | $0.00529 \pm 6.10835E-4$                 |
| A2            | $0.86658 \pm 0.01905$                    |
| x0            | $7123.05039 \pm 0.08636$                 |
| dx            | $1.74262 \pm 0.03219$                    |
| $\chi^2_{re}$ | $1.5013E-5$                              |
| $r^2_{COD}$   | 0.99942                                  |
| $r^2_{corr}$  | 0.99939                                  |

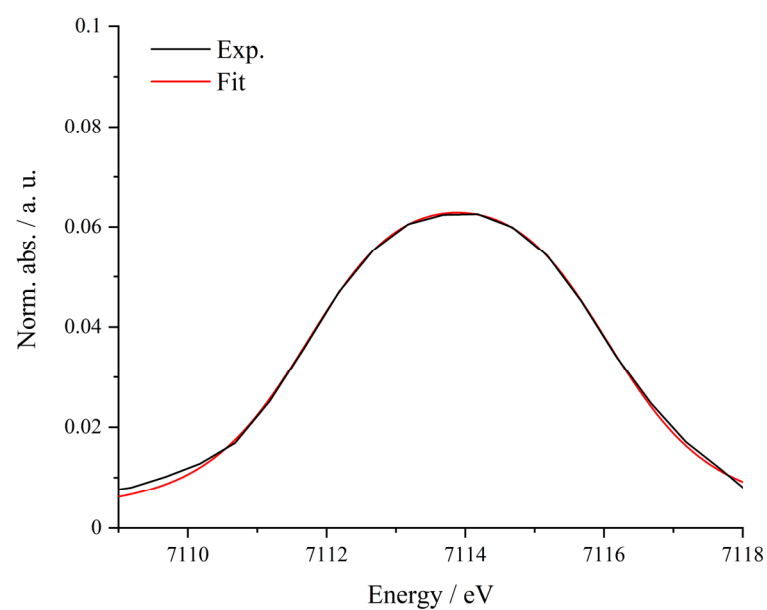

**Figure S20:** Prepeak area of Fe05 with inverse polynomial fit after removal of the main edge.

**Table S21:** Fit parameters of the prepeak fit for Fe05.

| Model          | InvsPoly                                                                |
|----------------|-------------------------------------------------------------------------|
| Equation       | $y=y_0+A/(1+A1*(2*(x-xc)/w)^2 + A2*(2*(x-xc)/w)^4 + A3*(2*(x-xc)/w)^6)$ |
| Plot           | Fe05                                                                    |
| y0             | $0.00346 \pm 0.00173$                                                   |
| xc             | $7113.88537 \pm 0.02625$                                                |
| w              | $4.59746 \pm 3171995.4929$                                              |
| A              | $0.05939 \pm 0.00178$                                                   |
| A1             | $0.40488 \pm 558690.86759$                                              |
| A2             | $0.41616 \pm 1148502.29772$                                             |
| A3             | $0.11773 \pm 487381.4119$                                               |
| $\chi^2_{red}$ | 2.45021E-6                                                              |
| $r^2_{COD}$    | 0.99636                                                                 |
| $r^2_{corr}$   | 0.99491                                                                 |

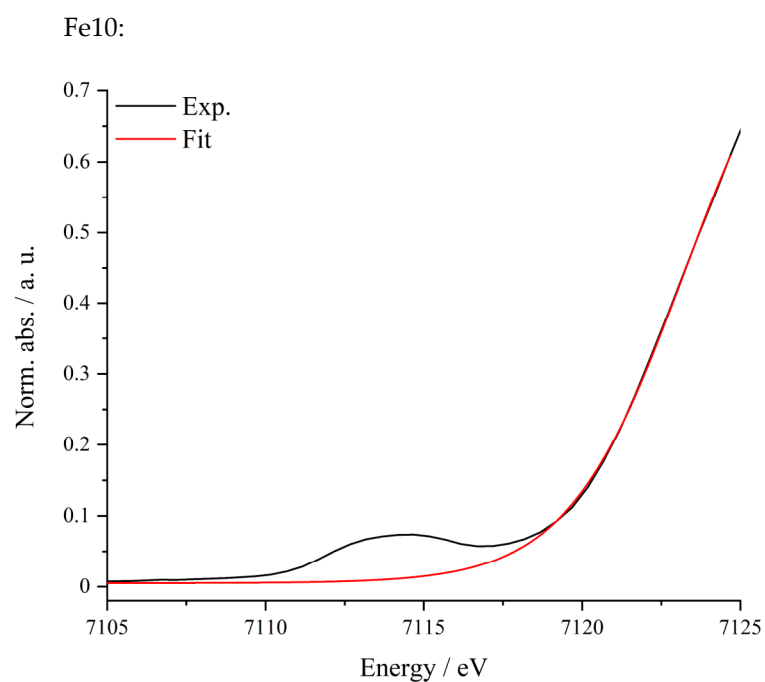

**Figure S21:** Prepeak area of Fe10 and the background to remove the main edge, obtained by a Boltzmann function.

**Table S22:** Fit parameters of the background fit for Fe10.

| Model         | Boltzmann                                |
|---------------|------------------------------------------|
| Equation      | $y = A2 + (A1-A2)/(1 + \exp((x-x0)/dx))$ |
| Plot          | Fe10                                     |
| A1            | $0.00496 \pm 6.03096E-4$                 |
| A2            | $0.88208 \pm 0.02301$                    |
| x0            | $7123.22575 \pm 0.10531$                 |
| dx            | $1.83865 \pm 0.03722$                    |
| $\chi^2_{re}$ | $1.49001E-5$                             |
| $r^2_{COD}$   | 0.9994                                   |
| $r^2_{corr}$  | 0.99936                                  |

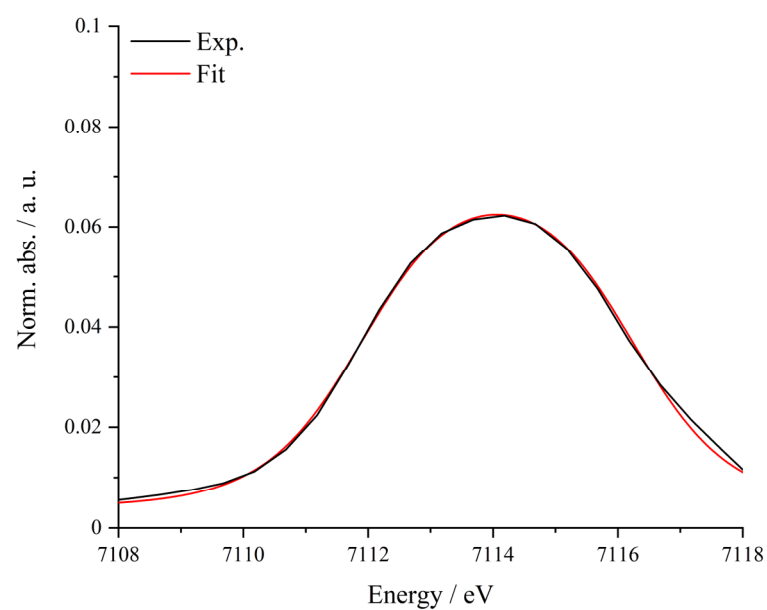

**Figure S22:** Prepeak area of Fe10 with inverse polynomial fit after removal of the main edge.

**Table S23:** Fit parameters of the prepeak fit for Fe10.

| Model          | InvsPoly                                                                |
|----------------|-------------------------------------------------------------------------|
| Equation       | $y=y_0+A/(1+A1*(2*(x-xc)/w)^2 + A2*(2*(x-xc)/w)^4 + A3*(2*(x-xc)/w)^6)$ |
| Plot           | Fe10                                                                    |
| y0             | Fe10                                                                    |
| xc             | $0.00648 \pm 0.00725$                                                   |
| w              | $7114.06544 \pm 0.017$                                                  |
| A              | $4.05682 \pm 5774125.59664$                                             |
| A1             | $0.05577 \pm 0.00704$                                                   |
| A2             | $0.32289 \pm 919147.83869$                                              |
| A3             | $0.30113 \pm 1714388.62247$                                             |
| $\chi^2_{red}$ | $0.05151 \pm 439853.97278$                                              |
| $r^2_{COD}$    | $8.89577E-7$                                                            |
| $r^2_{corr}$   | $0.99832$                                                               |

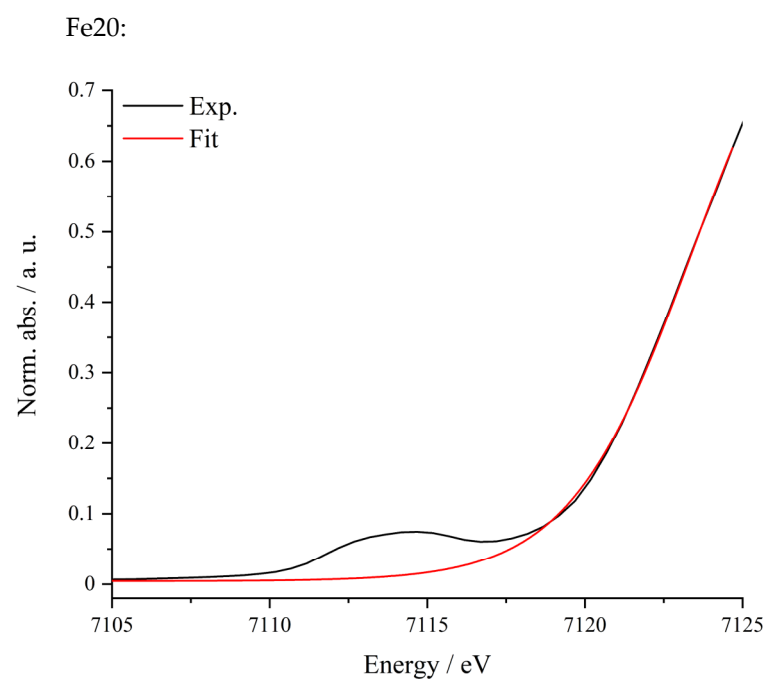

**Figure S23:** Prepeak area of Fe20 and the background to remove the main edge, obtained by a Boltzmann function.

**Table S24:** Fit parameters of the background fit for Fe20.

| Model          | Boltzmann                                |
|----------------|------------------------------------------|
| Equation       | $y = A2 + (A1-A2)/(1 + \exp((x-x0)/dx))$ |
| Plot           | Fe20                                     |
| A1             | $0.00435 \pm 6.52698E-4$                 |
| A2             | $0.93461 \pm 0.02803$                    |
| x0             | $7123.38387 \pm 0.12485$                 |
| dx             | $1.94507 \pm 0.04109$                    |
| $\chi^2_{red}$ | $1.7425E-5$                              |
| $r^2_{COD}$    | 0.99931                                  |
| $r^2_{corr}$   | 0.99927                                  |

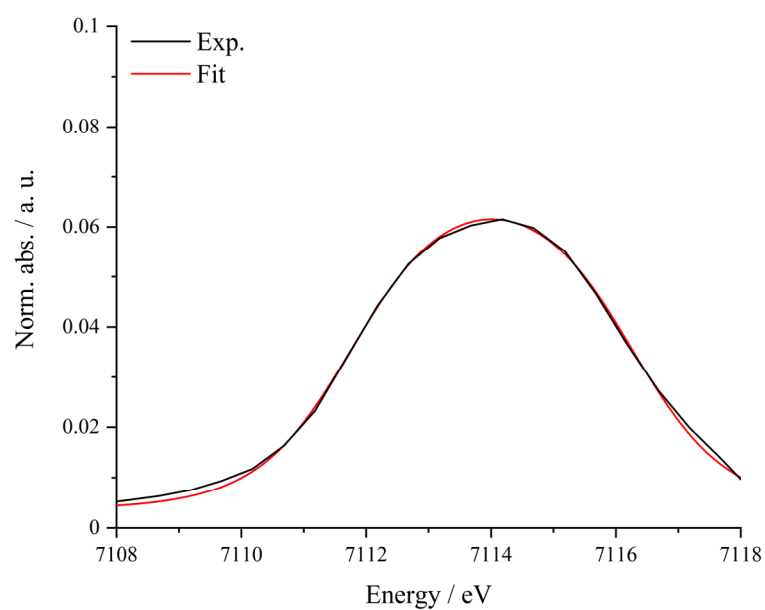

**Figure S24:** Prepeak area of Fe20 with inverse polynomial fit after removal of the main edge.

**Table S25:** Fit parameters of the prepeak fit for Fe20.

| Model         | InvsPoly                                                                |
|---------------|-------------------------------------------------------------------------|
| Equation      | $y=y_0+A/(1+A1*(2*(x-xc)/w)^2 + A2*(2*(x-xc)/w)^4 + A3*(2*(x-xc)/w)^6)$ |
| Plot          | Fe20                                                                    |
| y0            | $0.0035 \pm 8.78886E-4$                                                 |
| xc            | $7114.01046 \pm 0.02646$                                                |
| w             | $5.12845 \pm 3.9464E7$                                                  |
| A             | $0.05802 \pm 0.00121$                                                   |
| A1            | $0.5623 \pm 8653906.19097$                                              |
| A2            | $0.42336 \pm 1.30313E7$                                                 |
| A3            | $0.28062 \pm 1.29566E7$                                                 |
| $\chi^2_{rd}$ | $2.30855E-6$                                                            |
| $r^2_{COD}$   | 0.99634                                                                 |
| $r^2_{corr}$  | 0.99512                                                                 |

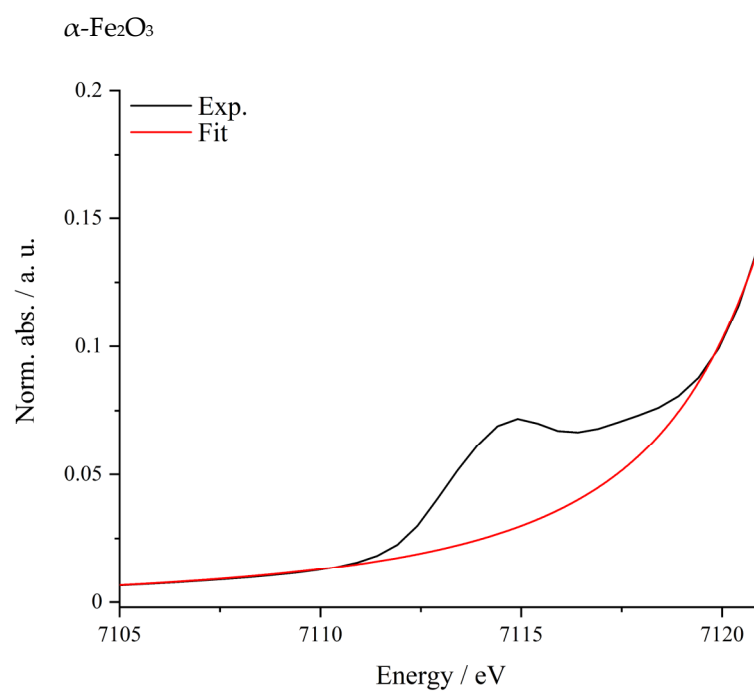

**Figure S25:** Prepeak area of  $\alpha$ -Fe<sub>2</sub>O<sub>3</sub> at the Fe K-edge and the background to remove the main edge, obtained by a Lorentzian-type function.

**Table S26:** Fit parameters of the background fit for  $\alpha$ -Fe<sub>2</sub>O<sub>3</sub>.

| Model          | Lorentz                                                                       |
|----------------|-------------------------------------------------------------------------------|
| Equation       | $y = y_0 + \frac{2 \cdot A}{\pi} \cdot \frac{w}{(4 \cdot (x - x_c)^2 + w^2)}$ |
| $y_0$          | $-0.00178 \pm 6.17985\text{E-}4$                                              |
| $x_c$          | $7125.08027 \pm 0.59067$                                                      |
| $w$            | $5.35235 \pm 0.72219$                                                         |
| $A$            | $4.0458 \pm 1.05539$                                                          |
| $\chi^2_{red}$ | $3.41027\text{E-}7$                                                           |
| $r^2_{corr}$   | $0.99979$                                                                     |

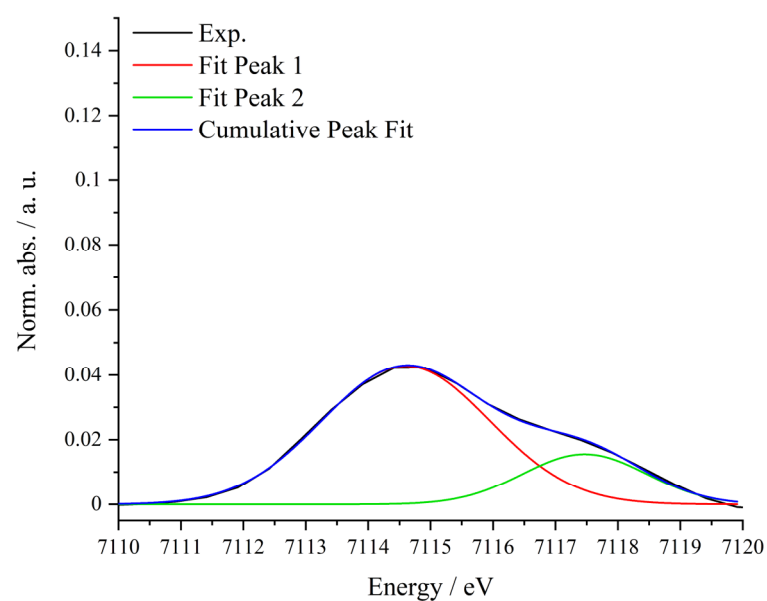

**Figure S26:** Background-corrected prepeak of  $\alpha$ -Fe<sub>2</sub>O<sub>3</sub> and corresponding Gaussian-type peak fits and cumulative peak fit.

**Table S27:** Fit parameters of the prepeak fit of  $\alpha$ -Fe<sub>2</sub>O<sub>3</sub>.

| Model          | Gauss                                                |                           |
|----------------|------------------------------------------------------|---------------------------|
| Equation       | $y=y_0 + (A/(w*\sqrt{\pi/2}))*\exp(-2*((x-xc)/w)^2)$ |                           |
| Plot           | Peak1                                                | Peak2                     |
| y0             | $0 \pm 2.84616\text{E-}4$                            | $0 \pm 2.84616\text{E-}4$ |
| xc             | $7114.60158 \pm 0.03656$                             | $7117.46756 \pm 0.0772$   |
| w              | $2.68567 \pm 0.06306$                                | $1.98719 \pm 0.10987$     |
| A              | $0.14395 \pm 0.00405$                                | $0.03863 \pm 0.00339$     |
| $\chi^2_{red}$ | 3.6954E-7                                            |                           |
| $r^2_{corr}$   | 0.99839                                              |                           |

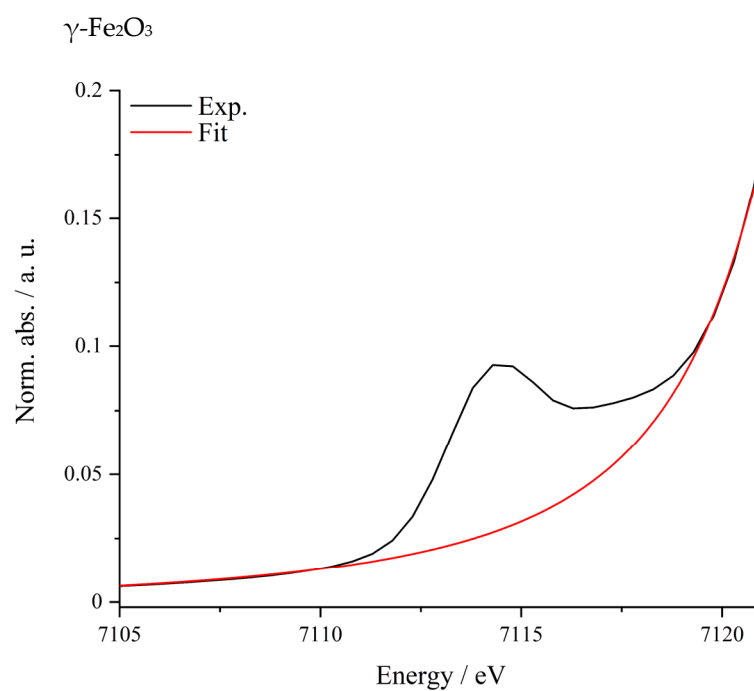

**Figure S27.** Prepeak area of  $\gamma\text{-Fe}_2\text{O}_3$  at the Fe K-edge and the background to remove the main edge, obtained by a Lorentzian-type function.

**Table S28:** Fit parameters of the background fit for  $\gamma\text{-Fe}_2\text{O}_3$ .

| Model          | Lorentz                                                               |
|----------------|-----------------------------------------------------------------------|
| Equation       | $y = y_0 + (2 \cdot A / \pi) \cdot (w / (4 \cdot (x - x_c)^2 + w^2))$ |
| $y_0$          | $-0.00211 \pm 6.79682\text{E-}4$                                      |
| $x_c$          | $7124.56476 \pm 0.56585$                                              |
| $w$            | $4.81389 \pm 0.69828$                                                 |
| $A$            | $4.28828 \pm 1.19353$                                                 |
| $\chi^2_{red}$ | $4.27368\text{E-}7$                                                   |
| $r^2_{corr}$   | 0.99981                                                               |

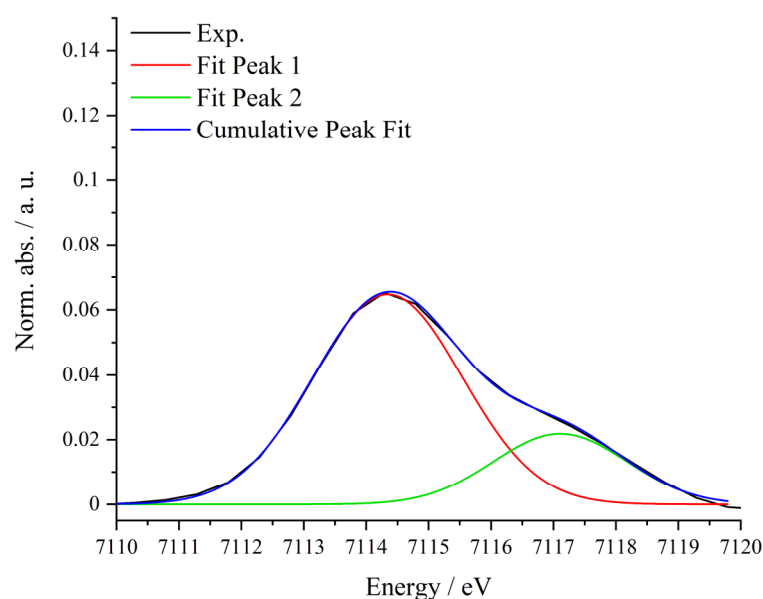

**Figure S28:** Background-corrected prepeak of  $\gamma$ -Fe<sub>2</sub>O<sub>3</sub> and corresponding Gaussian-type peak fits and cumulative peak fit.

**Table S29:** Fit parameters of the prepeak fit of  $\gamma$ -Fe<sub>2</sub>O<sub>3</sub>.

| Model          | Gauss                                                |                          |
|----------------|------------------------------------------------------|--------------------------|
| Equation       | $y=y_0 + (A/(w*\sqrt{\pi/2}))*\exp(-2*((x-xc)/w)^2)$ |                          |
| Plot           | Peak1                                                | Peak2                    |
| y0             | $0 \pm 3.00394E-4$                                   | $0 \pm 3.00394E-4$       |
| xc             | $7114.34287 \pm 0.02922$                             | $7117.10866 \pm 0.07861$ |
| w              | $2.39884 \pm 0.04445$                                | $2.14073 \pm 0.10752$    |
| A              | $0.19461 \pm 0.00474$                                | $0.0586 \pm 0.00441$     |
| $\chi^2_{red}$ | 4.62017E-7                                           |                          |
| $r^2_{corr}$   | 0.99908                                              |                          |

#### Prepeak and Edge Positions

**Table S30:** Prepeak and edge positions of Fe01 to Fe20 and the  $\alpha$ - and  $\gamma$ -Fe<sub>2</sub>O<sub>3</sub> references.

| Catalyst                                 | Pre-peak [eV] |        | Edge position [eV] |
|------------------------------------------|---------------|--------|--------------------|
| Fe01                                     | 7114.0        |        | 7126.0             |
| Fe025                                    | 7113.9        |        | 7125.7             |
| Fe05                                     | 7113.9        |        | 7125.4             |
| Fe10                                     | 7114.1        |        | 7125.6             |
| Fe20                                     | 7114.0        |        | 7125.4             |
| $\alpha$ -Fe <sub>2</sub> O <sub>3</sub> | 7114.6        | 7117.5 | 7125.1             |
| $\gamma$ -Fe <sub>2</sub> O <sub>3</sub> | 7114.3        | 7117.1 | 7125.9             |

## EXAFS Analysis (Fe01 - Fe20):

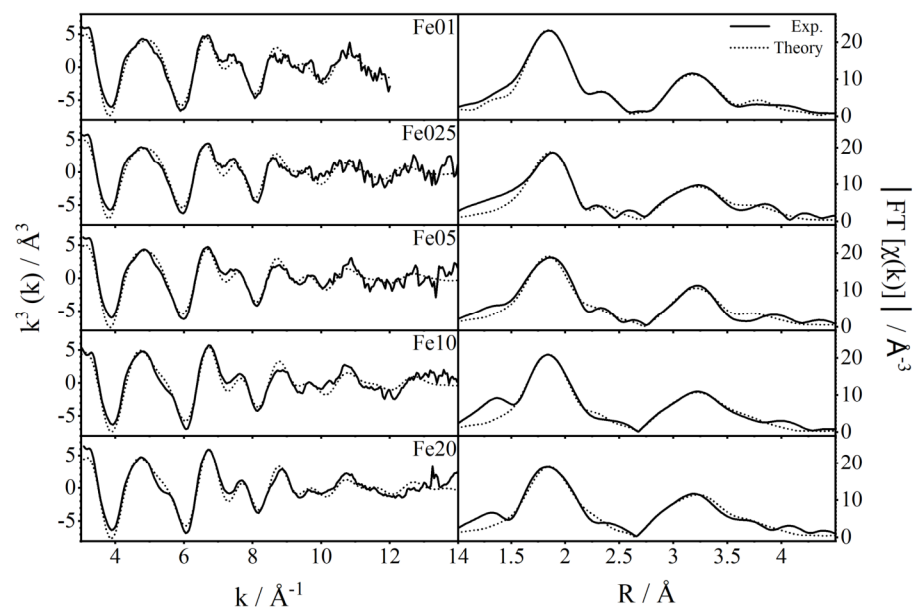

**Figure S29:**  $k^3\chi(k)$  of the EXAFS spectra (left) and the corresponding Fourier transformed functions (right) of catalyst Fe01 to Fe20 and the fitted spectra.

## 8. Catalytic Activity

### 8.1. Catalysis Setup and Parameters

Catalytic experiments were conducted with 1 vol% CO (1.9 purity) in nitrogen (5.0), oxygen (4.5) and argon (5.0). The pressures were reduced by double stage reducing valves (GCE druva®) to a constant rate of 5 bar. The final gas mixture was set by mass flow controllers (ANALYT-MTC Messtechnik GmbH) to yield a lean composite of 1000 ppm CO and 10 vol% oxygen in inert gas with a total flow rate of 500 ml/min. The packed bed plug flow reactor was heated by a clamshell furnace (HORST GmbH, equipped with a JUMO dTron 304 controller) in a range of 200 mm (packed bed length approx. 10 mm) to ensure a uniform heating of the gas stream and the packed bed. The composition of the exhaust gas was analyzed by a NDIR analyzer (Infralyt 50, SAXON Junkalor® GmbH) equipped with two separate channels, one for carbon monoxide and one for carbon dioxide, both calibrated for a range of 0 to 1000 ppm.

### 8.2. Measurements at constant temperatures:

Fe01:

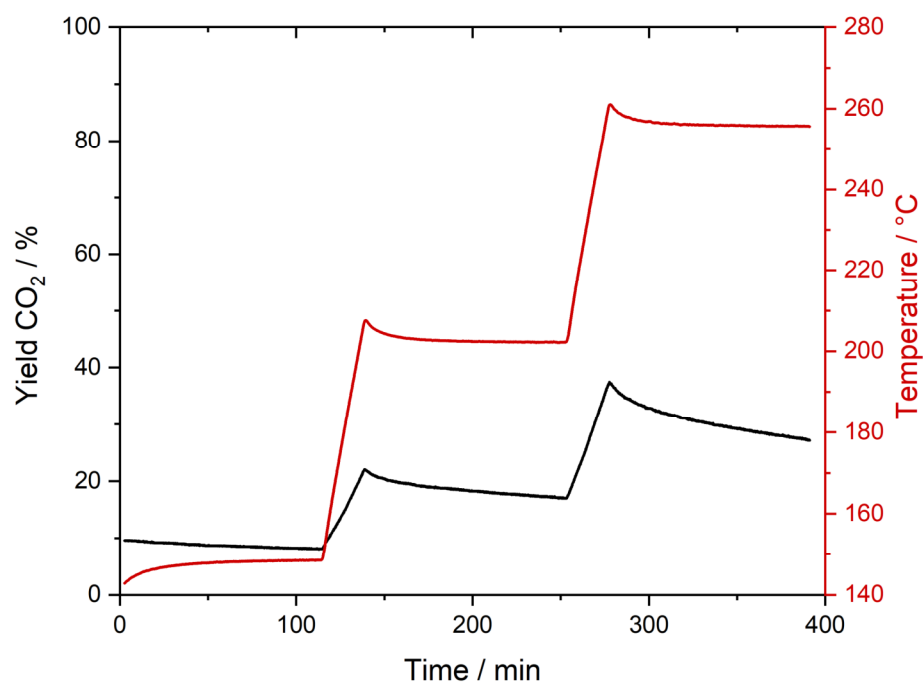

**Figure S30:** CO oxidation experiment of Fe01 at constant temperatures.

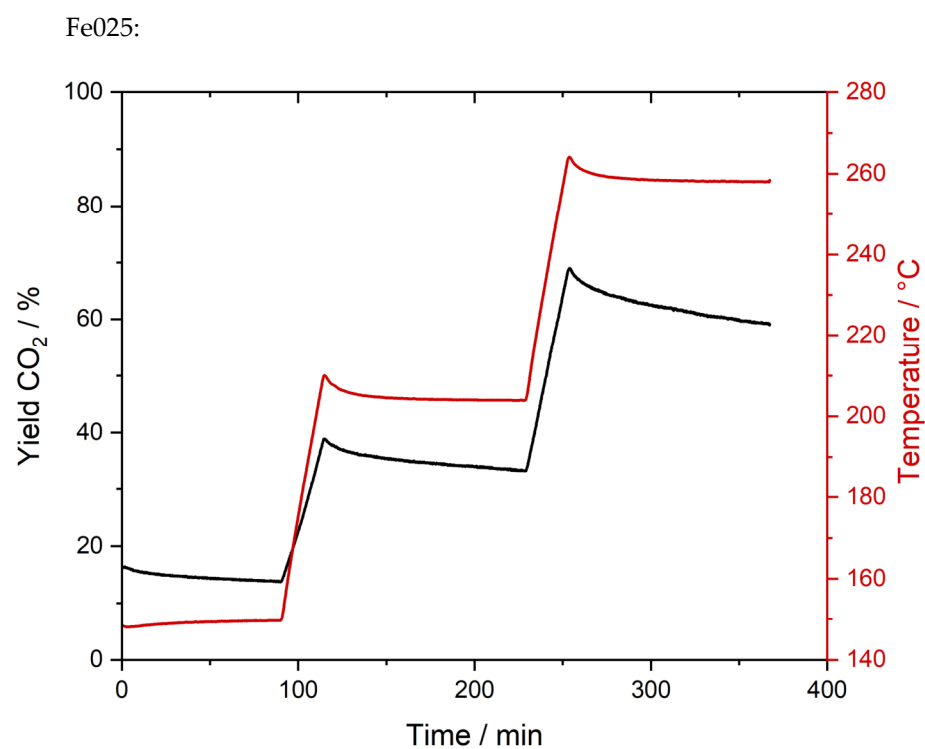

Figure S31: CO oxidation experiment of Fe025 at constant temperatures.

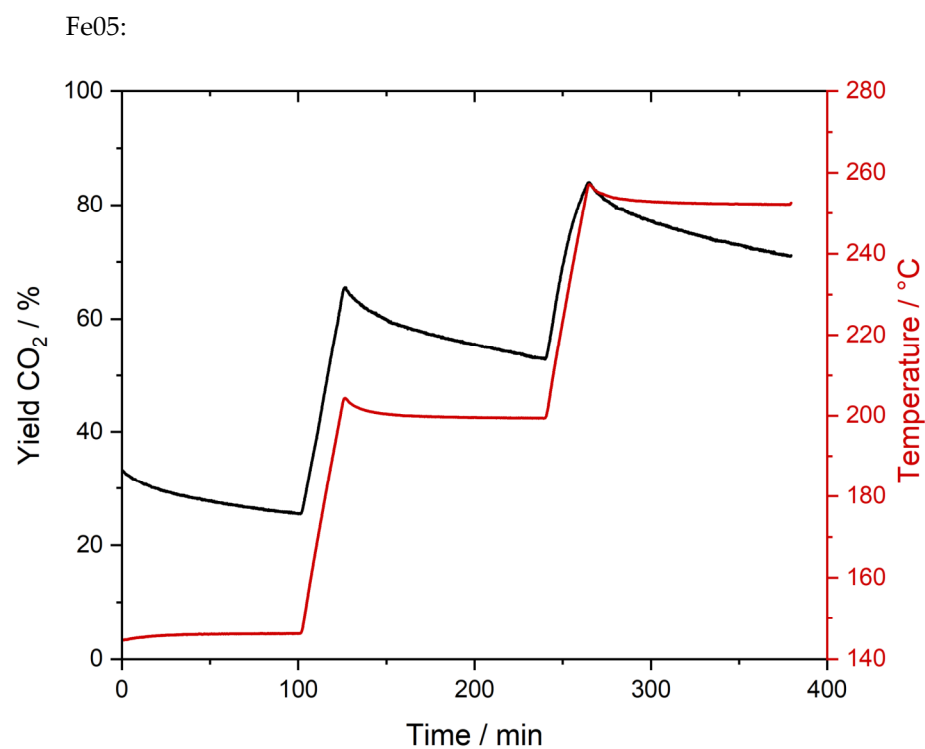

Figure S32: CO oxidation experiment of Fe05 at constant temperatures.

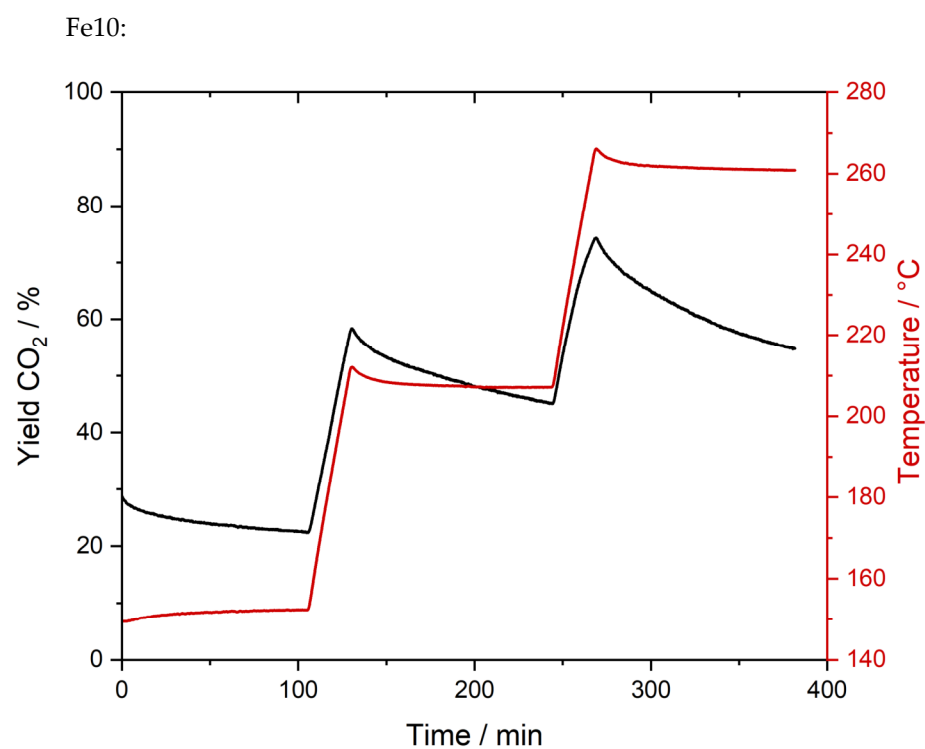

Figure S33: CO oxidation experiment of Fe10 at constant temperatures.

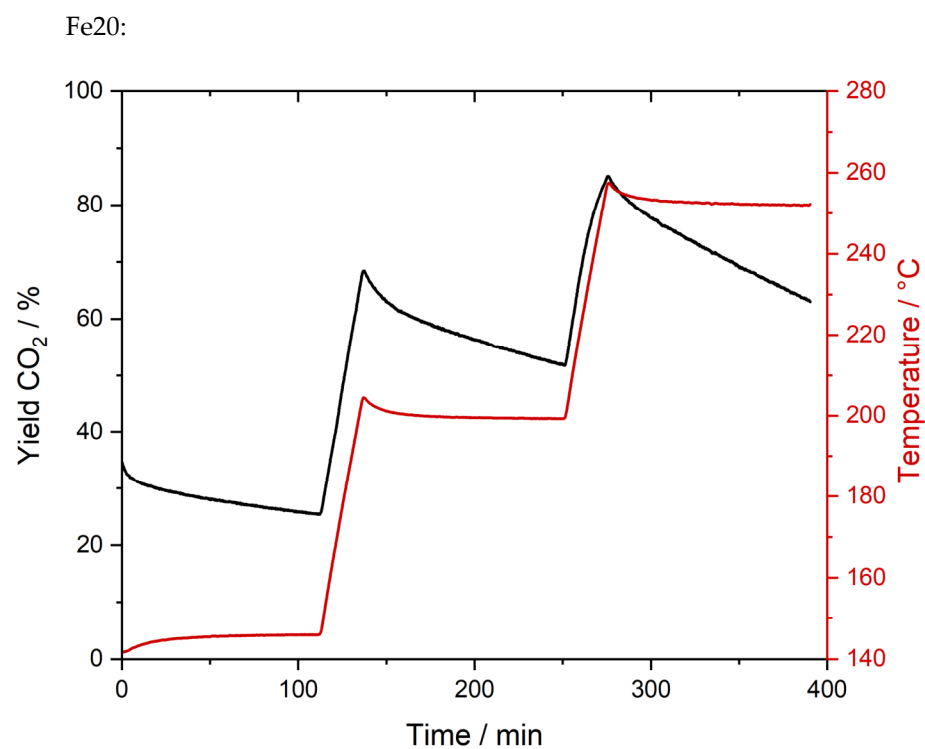

Figure S34: CO oxidation experiment of Fe20 at constant temperatures.

## References

1. Macrae, C.F.; Sovago, I.; Cottrell, S.J.; Galek, P.T.A.; McCabe, P.; Pidcock, E.; Platings, M.; Shields, G.P.; Stevens, J.S.; Towler, M.; et al. Mercury 4.0: from visualization to analysis, design and prediction. *J. Appl. Crystallogr.* **2020**, *53*, 226–235, doi:10.1107/S1600576719014092.
2. Gutiérrez, G.; Taga, A.; Johansson, B. Theoretical structure determination of  $\gamma$ -Al<sub>2</sub>O<sub>3</sub>. *Phys. Rev. B* **2001**, *65*, doi:10.1103/PhysRevB.65.012101.
3. Smrcok, L.; Langer, V.; Krestan, J. Gamma-alumina: a single-crystal X-ray diffraction study. *Acta Crystallogr., Sect. C: Cryst. Struct. Commun.* **2006**, *62*, i83–i84, doi:10.1107/S0108270106026850.
